1           **Unexpected diversity of CRISPR unveils**  
2           **some evolutionary patterns of repeated**  
3           **sequences in *Mycobacterium tuberculosis***

4  
5                           Guislaine Refrégier<sup>1\*</sup>, Christophe Sola<sup>1\*</sup>, Christophe Guyeux<sup>2</sup>.

6  
7           <sup>1</sup>: Institute for Integrative Biology of the Cell (I2BC), CEA, CNRS, Univ. Paris-Sud,  
8                           Université Paris-Saclay, 91198, Gif-sur-Yvette cedex, France

9           <sup>2</sup>: FEMTO-ST Institute, UMR 6174 CNRS, DISC Computer Science Department,  
10                          Univ. Bourgogne Franche-Comté (UBFC), 16 Route de Gray, 25000 Besançon

11  
12  
13  
14  
15  
16  
17  
18  
19  
20  
21  
22  
23  
24  
25  
26  
27  
28           \*co-corresponding authors : [guislaine.refregier@u-psud.fr](mailto:guislaine.refregier@u-psud.fr), [Christophe.sola@i2bc.paris-](mailto:Christophe.sola@i2bc.paris-saclay.fr)  
29           [saclay.fr](mailto:Christophe.sola@i2bc.paris-saclay.fr)

## 30 **Abstract**

31 Diversity of the CRISPR locus of *Mycobacterium tuberculosis* complex has been studied  
32 since 1997 for molecular epidemiology purposes. By targeting solely the 43 spacers present in  
33 the two first sequenced genomes (H37Rv and BCG), it gave a biased idea of CRISPR  
34 diversity and ignored diversity in the neighbouring *cas*-genes.

35 We set up tailored pipelines to explore the diversity of CRISPR-cas locus in Short Reads. We  
36 analyzed data from a representative set of 198 clinical isolates as evidenced by well-  
37 characterized SNPs.

38 We found a relatively low diversity in terms of spacers: we recovered only the 68 spacers that  
39 had been described in 2000. We found no partial or global inversions in the sequences, letting  
40 always the Direct Variant Repeats (DVR) in the same order. In contrast, we found an  
41 unexpected diversity in the form of: SNPs in spacers and in Direct Repeats, duplications of  
42 various length, and insertions at various locations of the *IS6110* insertion sequence, as well as  
43 blocks of DVR deletions. The diversity was in part specific to lineages. When reconstructing  
44 evolutionary steps of the locus, we found no evidence for SNP reversal. DVR deletions were  
45 linked to recombination between *IS6110* insertions or between Direct Repeats.

46 This work definitively shows that CRISPR locus of *M. tuberculosis* did not evolve by  
47 classical CRISPR adaptation (incorporation of new spacers) since the last most recent  
48 common ancestor of virulent lineages. The evolutionary mechanisms that we discovered  
49 could be involved in bacterial adaptation but in a way that remains to be identified.

50

## 51 **Introduction**

52 Since the rise of molecular biology, repeated sequences (CRISPR, IS, VNTRs) have been  
53 used to track relatedness between individuals (Garcia De Viedma and Perez-Lago, 2018).  
54 Indeed, they share two major features essential for diversity studies: ease of study, and rapid  
55 mutation rate (van Belkum, et al., 1998). In pathogens like *Mycobacterium tuberculosis*  
56 complex (MTC) they have been used for molecular epidemiology, complementing contact  
57 tracing, and/or identifying unsuspected links (Garcia De Viedma and Perez-Lago, 2018). In  
58 the last 5 years however, popularity of most repeated sequences has decreased first because  
59 they are larger than reads provided by Short Reads Sequencing, and second because of the  
60 generalization of Whole-Genome-Sequence availability and use of softwares analyzing Single

61 Nucleotide Polymorphisms (SNPs) (Jajou, et al., 2018; Schurch, et al., 2010). In fact, some of  
62 these repeated sequences have sufficient variation to characterize them based on reads. The  
63 boom of Whole Genome Sequencing provides plenty of data to dig into for evolutionary  
64 studies and changes the way drug-susceptibility testing will be done in the future  
65 (Consortium, et al., 2018; Mulholland, et al., 2019). We will show in the case of CRISPR  
66 sequences how this diversity can reveal unexpected evolutionary patterns. We will show in  
67 addition that in the species of focus, namely MTC, there has been no new spacers acquisition  
68 for at least 5,000 years, *i.e.* no adaptative evolution in the common CRISPR terminology  
69 despite the presence of *Cas* genes.

70 CRISPR acronym stands for Clustered Regularly Interspaced Short Palindromic Repeats  
71 (Jansen, et al., 2002). They are characterized by repeats of 21 to 37 nt called Direct Repeats  
72 (DR) and the presence of unique sequences, called spacers, between each DR copy. Blocks of  
73 one DR and the following spacer has been termed Direct Variable Repeat (DVR) (Groenen, et  
74 al., 1993). CRISPR loci were first identified in *Escherichia coli* (Ishino, et al., 1987), their  
75 role in bacterial immunity was suspected in *Yersinia pestis* (Pourcel, et al., 2005), and later  
76 demonstrated in *Streptococcus thermophilus* (Barrangou, et al., 2007). Their presence has  
77 been detected in around 50% percent of eubacteria and 90% of archaeobacteria (Couvin, et al.,  
78 2018; Grissa, et al., 2008; Grissa, et al., 2007; Grissa, et al., 2007). Various classes of  
79 CRISPR systems have been described (Makarova, et al., 2015). They all share the same  
80 mechanism of spacer acquisition, inserting part of a foreign sequence designated as  
81 *protospacer*, with a length similar to that of the repeats, next to the 5' end of the locus. In  
82 *Salmonella enterica* for instance, the exploration of CRISPR diversity has shown that  
83 sequences including several DVR could be deleted, and that mutations could occur in spacers  
84 (Fabre, et al., 2012), however, the increased CRISPR dictionary as well as the restricted  
85 number of genomes sequenced reduced the possibility to have an extensive understanding of  
86 their evolutionary mechanisms.

87 *Mycobacterium tuberculosis* complex (MTC) is the agent of mammal tuberculosis, with  
88 human-adapted lineages being the most diverse and well spread. Its emergence and  
89 diversification dates back to at least 5,000 years old. There are six main and widely spread  
90 human-adapted sublineages referred to as L1 to L6 and an animal-adapted lineage (Coll, et al.,  
91 2014; Gagneux, 2012; Hershberg, et al., 2008), as well as a few rare and endemic human  
92 lineages (L7, L8, L0) (Blouin, et al., 2012; Ngabonziza, et al., 2019). Their diversity is being

93 progressively unveiled through extensive WGS (Coll, et al., 2014; Palittapongarnpim, et al.,  
94 2018; Shitikov, et al., 2017).

95 *M. tuberculosis* reference clinical isolate H37Rv as well as most *M. tuberculosis* isolates carry  
96 a CRISPR locus together with a complete *cas* genes set of type III-A (Makarova, et al., 2015).  
97 Rare isolates lack part of CRISPR and or *cas* genes (Freidlin, et al., 2017). Partial analysis of  
98 the CRISPR diversity has been used since 1997 to explore the clinical isolates relatedness  
99 through a technique coined as « spoligotyping » (Kamerbeek, et al., 1997). In this technique,  
100 the presence of 43 spacers identified in H37Rv (n=35) or in *M. bovis* BCG (n=8) are looked  
101 for. This results in a barcode that can be easily shared and stored. Spoligotyping has led to the  
102 set-up of the first worldwide database for this pathogen counting today more than 111,000  
103 patterns originating from 169 countries (Couvin, et al., 2018). The absence in some isolates of  
104 individual or consecutive spacers has revealed the possibility for small and large deletions of  
105 adjacent DVR (Brudey, et al., 2006; Filliol, et al., 2003). Large deletions proved good  
106 markers of tuberculosis diversification (Comas, et al., 2009; Kato-Maeda, et al., 2011).

107 Extensive MTC CRISPR structure has been previously explored in 19 *M. tuberculosis* clinical  
108 isolates belonging to EAI (L1), Beijing (L2), Euro-American (L4) lineages, 5 from animal  
109 species *M. bovis* and *M. microti*, and one *M. canettii* (van Embden, et al., 2000). This work  
110 showed that additional diversity exists in the form of DR variants, and duplication of DVR. It  
111 also documented the presence of insertion sequence IS6110 in two different positions and  
112 orientations in L2 and L4 lineages. CRISPR diversity however remains unexplored in many  
113 sublineages as well as in major lineages such as L3, L5 and L6.

114 We recently set up a pipeline to reconstruct reliably CRISPR locus of *M. tuberculosis*  
115 (Guyeux, et al., 2019a). We selected Short Reads Archives (SRA) from the more than 60,000  
116 available today to represent clinical isolates diversity and derived their CRISPR locus  
117 structure. The specific questions we tackled are: does MTC CRISPR locus contain additional  
118 spacers in addition to the 68 spacers ones described? What are the other patterns of diversity  
119 in CRISPR-Cas locus? What kind of underlying mechanisms of evolution can account for the  
120 observed diversity? Did the main lineages evolve similarly or are they CRISPR features  
121 specific of some lineages and/or sublineages? What is the most likely CRISPR sequence of  
122 tuberculosis most recent common ancestor (MRCA)?

123

124

125

## 126 **Methods**

### 127 **Data collection**

128 One hundred ninety-eight (n=198) Sequence Reads Archives obtained by paired-end  
129 sequencing with Illumina technology were selected from a local database of more than 3,500  
130 genome sequences based on their representativeness of *M. tuberculosis* lineages (Guyeux, et  
131 al., 2019a). Namely, the following numbers of data were included for each lineage: 55 for  
132 Lineage 1, 20 for Lineage 2, 17 from Lineage 3, 60 from Lineage 4, 25 from Lineage 5, 7  
133 from Lineage 6, 10 from Lineage 7, 1 from *M. bovis*, 1 from *M. caprae*, 1 from *M. microti*, 1  
134 from *M. pinnipedii*. Data were downloaded as fasta files to decrease storage space as  
135 erroneous sequence will be ignored in the analytic steps.

136

### 137 **Identification and cataloging of CRISPR subsequences of interest**

138 We first looked for spacer variants by searching for patterns made up of the last 12  
139 nucleotides of most common DR sequence and later referred to as DR0 (Kamerbeek, et al.,  
140 1997), followed by 10 to 70 nucleotides, followed by the first 12 nucleotides of the DR0. The  
141 resulting subsequences were compared to the reference spacers to be declared either as a new  
142 spacer or a variant of a known spacer (for more details; see (Guyeux, et al., 2019a)). We then  
143 used this enhanced catalogue of spacers to find DR variants, in the same way as above. The  
144 new DRs thus obtained were used for a second phase of discovery of spacers, as described  
145 above.

146 To the collection of different spacers and DR, we added the following subsequences of  
147 interest to be discovered in the CRISPR loci:

- 148 1) the beginning and end sequences of *IS6110* and its reverse complement (40 bp each time);
- 149 2) those corresponding to *Rv2816c* (*Cas2* gene of the Cas locus) and *Rv2813c*, reputed to  
150 border the CRISPR locus;
- 151 3) the sequences found between these bordering genes and first or last DR;
- 152 4) the beginning and the end of each *Cas* gene;
- 153 5) sequences in the neighbouring genes (*Cas* or others) when these sequences were found  
154 besides an *IS6110* sequence during reconstruction –see below- (for more details; see (Guyeux,  
155 et al., 2019a)).

156 An extended version of these sequences of interest is presented in **Supplementary file 1**.

157

158

## 159 **Locus reconstruction**

160 An automated contig building method based on De Bruijn approach was set up to reconstruct  
161 large fragments of the CRISPR. CRISPR with *IS6110* insertion could not directly be  
162 reconstructed as no read can overlap the full *IS6110* sequence (1,355 bp in length). Another  
163 reason for non-resolution of contigs is the existence of duplications: they lead to bifurcations  
164 in the de Bruijn graph. A specific search for duplications was included looking for patterns of  
165 the form  $sp(l)*DRX*sp(m)$ , where  $l \geq m$  (for more details; see (Guyeux, et al., 2019a)).

166 To facilitate the contigs concatenation, sequences were simplified by replacing each  
167 subsequence of interest by its name according to the catalogue described above. Final  
168 reconstruction taking into account *IS6110* insertions was performed manually. In some  
169 samples, contig reconstruction was confirmed by retrieving the identity of the spacer  
170 downstream the last spacer of a duplication. When one side of the CRISPR could not be  
171 automatically recovered for instance due to an *IS6110* insertion with a single end found in the  
172 catalog of CRISPR locus sequences, a stepwise manual search for the neighbouring sequences  
173 was performed until recovery of the other *IS6110* end. The 60nt sequence found nearby was  
174 labelled according to the gene it belongs to and its position, and it was added to the catalog of  
175 sequences of interest.

176

## 177 **Results**

178

### 179 **1. Exhaustive catalog of spacers in *M. tuberculosis* complex *stricto sensu***

180 We set up a method to identify not only variant of known spacers but also unknown spacers  
181 from *M. tuberculosis* CRISPR locus. Surprisingly, despite having explored more than 1,000  
182 sequencing data (Guyeux, et al., 2019a), we found no new spacers as compared to the 68  
183 described previously for *M. tuberculosis sensu stricto* (excluding *M. canettii* or the new L0  
184 and L8 lineages) (van Embden, et al., 2000). The only new spacers that could be identified  
185 were found in *M. canettii* (data not shown). To identify whether this absence of new spacers  
186 could be due to a lack of sampling, we counted the cumulative number of spacers from the  
187 subset of isolates further described in this study upon 15 independent random samplings  
188 (**Figure 1**). We found that the 68 known spacers were all sampled after having examined from

189 3 to 25 isolates. Our sampling was therefore one order of magnitude above the one that seems  
190 necessary to be exhaustive.

191

## 192 **2. Global structure of *M. tuberculosis* CRISPR**

193 We reconstructed the whole CRISPR loci for 198 clinical isolates representative of all *M.*  
194 *tuberculosis* diversity excluding *M. canettii*. CRISPR is almost always preceded by a  
195 complete set of *cas* genes, was followed by *Rv2813*, circumvented by one Direct Repeat  
196 sequence, DR0, at each of its border as can be seen for archetypal isolates from each Lineage  
197 (**Figure 2**). External DR0s are bordered by specific sequences, one of 48nt in length at the  
198 beginning of the locus, after *Cas2*, one of 148nt at the end of the locus, before *Rv2813*  
199 (**Supplementary file 1**). These sequences are found in all isolates except in the case of large  
200 deletions (**Supplementary file 2**[IS6110 sheet]). Most of the times, the CRISPR-Cas locus  
201 includes one IS6110 copy as in the first isolate presented in **Figure 2** belonging to L1.1.1.6  
202 (ERR751749), but it can go up to three copies or down to zero (**Supplementary file 2**[IS6110  
203 sheet]). No other type of insertion sequence was ever discovered inside the region (data not  
204 shown).

205 The spacer sequences as well as those of the DR are always found in the same direction. Their  
206 order of succession is usually the expected one (the order of natural integers) although, as  
207 described below, various particular situations arise, for instance in case of duplications  
208 (**Supplementary file 3**). Duplications are identified not only by the order of successive  
209 spacers, but also by the relatively higher number of reads corresponding to the duplicated  
210 spacers. For instance, in an isolate belonging to L1.1.1.8 (ERR718201), while most spacers  
211 were found on an average of 27 reads, spacers 14 to 21 are found in 56 reads on average,  
212 which is approximately twice as much (**Figure 3**). A notable exception in this isolate is spacer  
213 16 that is found in only 31 reads. This however matches the fact that spacer 15 is half of the  
214 time followed by spacer 16 and the other half by spacer 17: in one of the two spacer 14-spacer  
215 21 region, DVR16 has been deleted (**Figure 3**).

216 Duplications occur in tandem most of the time. For instance, a second DVR21 is found after  
217 its normal copy in L2 isolates such as ERR234109, and an additional tandem DVR1-DVR2 is  
218 found downstream the standard pair in *M. bovis* ERR5022499 (**Figure 2**). Other examples  
219 include DVR32 in ERR234197 (L1.1.3.1), DVR39 in ERR234248 (L2.1). This can be seen  
220 directly in the Illumina sequences, for instance for ERR234248, where many reads contain the



221 end of 39, followed by a DR0, followed by the beginning of another 39, which has no chance  
222 of happening, in such a repeated way, by chance due to random reading noise. A notable  
223 exception to the natural order of succession of spacer is the case of the spacer 35, which can  
224 be found in the following two places: between 34 and 36 on the one hand, and after 41 on the  
225 other hand (**Figure 2, Supplementary file 4**). Consequently, in most cases, although this is  
226 not the case of H37Rv and related isolates, there are two copies of 35.

227 Another important and widely representative characteristic of MTC CRISPR locus is the  
228 presence of the IS6110 copy referenced in (Kamerbeek, et al., 1997) and that shares the same  
229 orientation than the CRISPR, *i.e.* corresponding to a IS6110c (**Figure 2**).

230

### 231 **3. Punctual variants in *M. tuberculosis* CRISPR**

232 Regarding intra-spacer diversity, we identified 20 spacers that harbored at least two variants,  
233 and concerned 48 (24%) out of the 198 isolates explored (**Supplementary file 2**[spacer  
234 sheet]). These variants consisted mainly of SNP, although a deletion was found in spacer 24  
235 in another dataset (genome ERR702419, lineage 5, data not shown). Interestingly, some of  
236 these variants are characteristic of specific lineages. For instance, a variant of spacer 38 is  
237 found in all isolates of lineage L1.1.1, one mutation is found in spacer 4 in all L6 isolates to  
238 which an additional one sometimes adds resulting in two possible variants. Two variants of  
239 spacer 6 characterize the endemic Abyssinian L7 isolates (**Figure 2, Supplementary file 5**).  
240 The frequency of spacer variants in L2-L3-L4-L7 was relatively low (6 independent variants  
241 detected in 107 isolates, ~5%), as compared to L1 lineage (11 independent variants out of a  
242 selection of 55 isolates, ~20%) and lineage gathering animal isolates and L5 and L6 (7  
243 independent variants for 34 isolates, ~20%).

244 Between two spacers, we have most of the time the DR0 sequence referenced in (van  
245 Embden, et al., 2000). However, this rule is incomplete and not general. Punctual variants  
246 were identified. First of all, between spacers 30 and 31, there is always, whatever the lineage,  
247 a sequence that we coined DR2 and that has one punctual mutation as compared to DR0 (see  
248 sequence in **Supplemental file 1**). Similarly, there is always a DR4 variant repeat between  
249 spacers 66 and 67, and again a DR5 variant between spacers 67 and 68. This is true for all  
250 lineages, with the notable exception of a sublineage of L6, which has yet the DR10 variant  
251 (**Figure 2, Supplementary file 2**[DR sheet]). Then, other types of variations were identified.  
252 For instance, between spacers 25 and 26, there are always only the last 24 nt of DR0 (a



253 sequence we name DRb2). Around the central *IS6110c*, between spacers 34 and 35, the DR0  
254 is split into two subsequences rDRa1 (upstream) and DRb1 (downstream). As expected due to  
255 *IS6110* insertion characteristics, the concatenation of these two sequences is 3nt larger than  
256 DR0 since 3 additional cytosines are present at each end of the insertion (Gonzalo-Asensio, et  
257 al., 2018; Thierry, et al., 1990). Yet, in a L5.1 isolate (ERR702419) where *IS6110c* inserted  
258 downstream spacer 44, *IS6110c* is preceded by the first 35 nt of DR0 and followed by its 6  
259 last nt, so that the duplicated target was this time 5nt in length (data not shown).

260 Some variants are shared over several but not all lineages or sublineages. For instance, DR6 is  
261 found between spacers 64 and 65, in all genomes of lineages L2 to L4, and only in those;  
262 DR10 is found between spacers 67 and 68 in L6. Similarly, the DR1 variant is found between  
263 14 and 15 only in Sublineage L1.1.1, and never in Sublineage L1.1.2, or in any other lineage.  
264 These findings are consistent with *M. tuberculosis* phylogeny and allow to infer that the  
265 mutation in L1.1.1 occurred shortly after separation from the rest of the other L1 sublineages.

266 Other punctual variants affect a single isolate (**Supplementary file 2**[spacer and DR sheets]  
267 for isolates affected, **Supplementary file 1** for their sequence). Each time, the size of the DR  
268 is respected (no indel, only the single nucleotide polymorphism) except for one case where a  
269 longer DR was found (data not shown). Altogether, these variants occurred all over the locus  
270 with no clear preferential subregion (**Supplementary file 6**).

271

#### 272 **4. Large scale variations and *IS6110* copies**

273 Large scale variations included on one hand deletions and, on the other hand, duplications. It  
274 should be noted that, at this stage, no inversion has been detected in MTC CRISPR.

275 Large-scale deletions were observed throughout the lineages, such as the one characterizing  
276 L2.2/Beijing sublineage that covers parts of *csm4* to an *IS6110* just before spacer 46 (#36 in  
277 the old nomenclature). As in the case of this specific deletion, many deletions were flanked by  
278 an *IS6110* insertion: the deletion between spacer 33 and spacer 45 in L3 isolates ERR234109,  
279 and the deletion between spacer 11 and spacer 35 in L7 isolates ERR1971863 (**Figure 2**). To  
280 infer potential intermediates for these deletions, we searched for clinical isolates related to the  
281 one carrying deletions, and harbouring several *IS6110* sequences. We found such evidence in  
282 Sublineage L4.1.2.1 (Haarlem sublineage). In this sublineage, a first set of isolates carry a  
283 7 DVR- deletion adjacent to an *IS6110* copy, namely between spacers 34 and the second copy  
284 of spacer 35 (for instance in ERR234259). A second set of clinical isolates (SRR5073877 and

285 ERR552680) harbours two *IS6110* copies, respectively the well-known one in the DR  
286 between spacers 34 and spacer 35, and another one in the DR between spacer 41 and the  
287 second spacer 35 (**Figure 4**). Interestingly, the borders of *IS6110* insertion in ERR234259  
288 corresponded well to the external borders of the two IS present in SRR5073877 and  
289 ERR552680. The left border consisted in the 17 first nt of DR0 (2nt less only than the rDRa1  
290 in the classical position), and the right border was the exact same 33-last nucleotides of DR0  
291 than the one found at the right of the second insertion in SRR5073877 and ERR552680. The  
292 CRISPR version with the two copies shares many features with that carrying the deletion,  
293 suggesting that it could correspond to its ancestral stage of evolution (**Figure 4**). The similar  
294 observation in L4.1.2.1 was made independently in a study performed in Hanoi (Maeda, et al.,  
295 2020).

296 These large scale deletions involved *cas* flanking genes in 23/198 (12%) of isolates, with two  
297 different borders in L2 isolates, two others in L4 and a third one in L3. In contrast, a single  
298 case was observed that affected *Rv2813* (**Supplementary file 2**[*IS6110* sheet]). We further  
299 explored this asymmetry using SITVIT2 2019 database (n=3852 SITs): 290 SITs harbored a  
300 deletion of spacer #1 (DVR2 in the new nomenclature) against 117 SITs with a deletion of  
301 spacer #43 (DVR65 in the new nomenclature), *i. e.* three times more deletions on the *cas*  
302 genes side.

### 303 **5. Likely MRCA CRISPR of *M. tuberculosis***

304 All variations we observed were concordant with the phylogeny of *M. tuberculosis*. We could  
305 thus infer the most likely structure of CRISPR locus of *M. tuberculosis* complex *sensu stricto*  
306 (without *M. canettii*), as well as its structure in all MRCA lineages. We found that global  
307 MRCA likely carried a full set of *cas* genes, a CRISPR with 69 spacers (the 68 spacers of  
308 different sequences + the repetition of spacer 35) interspersed mostly by DR0 except between  
309 spacers 25 and 26 (DRb2), spacers 30 and 31 (DR2), spacers 66 and 67 (DR4) and spacers 67  
310 and 68 (DR5). An ancestral and central *IS6110c* was inferred to lie at the same place as the  
311 one occupied in H37Rv, *i.e.* between spacers 34 and 35 (**Figure 4**). A deletion of DVR 54 to  
312 61 characterized MRCA of lineages 2, 3, 4 and 7, which is not documented in the classical  
313 form of the spoligotype as these spacers are not belonging to its set of 43 spacers. Other  
314 deletions corresponded to the ones found in spoligotype-43 format and used to define main  
315 sublineages. For instance, the deletion of spacers #33-36 in the old nomenclature for L4/Euro-  
316 American lineage (previously referred to as T family) corresponds to the deletion of DVR43  
317 to 50. Another example is the deletion of spacers #29-32, presence of spacer #33 and absence

318 of spacer #34 characteristic of Lineage 1 (previously referred to as EAI) (Filliol, et al., 2003)  
319 that corresponds to the deletion of DVR39 to 42, presence of DVR43 and absence of DVR44  
320 (**Figure 4**). Only L2 MRCA did not carry the well-known signature of Beijing isolates as L2  
321 includes not only the Beijing L2.2 sublineage but also the L2.1 proto-Beijing sublineage  
322 (Shitikov, et al., 2017). Interestingly, this ancestor harbors an *IS6110* insertion in one *cas*  
323 gene (namely *csm6*) but not at the border of the classical Beijing deletion. It also lacks  
324 DVR16 and DVR17.

## 325 **Discussion**

326 Thanks to our new Sequence Reads Archive-based genomic analysis pipeline, we explored  
327 the *M. tuberculosis* CRISPR sequences diversity in 198 clinical isolates representative of the  
328 MTC excluding *M. canettii*, which deserve new specific studies (Supply, et al., 2013; van  
329 Soolingen, et al., 1997). These data show that *M. tuberculosis* CRISPR locus can contains at  
330 most 69 spacers (68 + one duplication), is not prone to inversions, evolves by duplication and  
331 deletions through recombination between DR, but also and primarily through  
332 insertion/deletions implicating *IS6110*, by homologous recombination, and independently of  
333 lineage. We detail below the support for these different kinds of mutations and inferences that  
334 can be drawn concerning the functionality of CRISPR-Cas locus.

### 335 **Evolutionary mechanisms of MTC CRISPR locus expansion**

336 Despite the absence of acquisition of new spacers, MTC CRISPR locus is of relative long size  
337 in many isolates (for instance, 4,589 nt between Rv2813 and Rv2816c/*cas2* in H37Rv). This  
338 relates to its ability to continue to expand using mechanisms other than classical CRISPR  
339 adaptation.

340 A first mechanism of MTC CRISPR size expansion, when considered as the distance between  
341 its two borders, is the integration of *IS6110* insertion sequences (1,355 bp). The most frequent  
342 insertion is found between spacers 34 and 35 as in H37Rv genome. Other *IS6110* insertions  
343 were found along the whole MTC CRISPR locus, with up to two insertions in the CRISPR  
344 locus and three when considering the whole CRISPR-Cas locus. Other similar IS Sequences  
345 right next to or farther away, might be responsible for other homologous recombination  
346 mechanisms involving CRISPR.

347 The second CRISPR expansion mechanism identified in this overall review concerns  
348 duplications of DVR (DR + spacer). These duplications are of two main types. First of all,  
349 duplications can concern single DVR and place in tandem which was observed in 11

350 independent cases throughout our 198 samples. This type of tandem duplication concerns also  
351 several adjacent DVRs such as DVR1-2 in *M. bovis* or DVR14-15-16-17-18-19-20 in  
352 L1.1.1.7. Such multiple DVR duplications were observed 5 times in our sample, so that in  
353 total 16 independent events of tandem duplications were observed. The second type of  
354 duplications concerns DVR that are far away from their original position, a type we call  
355 “rearrangement duplications”. This first concerns DVR35 located between DVR41 and  
356 DVR42 as already mentioned above and supposedly in MTC MRCA CRISPR. Other  
357 examples include a second copy of DVR3 found between DVR12 and 13 found in  
358 ERR036187 (L4.3.4.1), while in ERR234197 (L1.1.3.1), there is an additional copy of  
359 DVR38 between DVR55 and 56. In one instance, this concerned several adjacent DVRs: a  
360 second copy of DVR50-51-52-53 is found between DVR3 and 4 in ERR2245409 (L3.1.1).  
361 Altogether, this made a total of 4 independent rearrangement-duplications. The fact that  
362 rearrangement duplications are less common than standard duplications suggests that they  
363 occur less frequently and/or that they are less stable. If the stability of rearrangement  
364 duplications was low, there should be several cases of deletions between the two copies of  
365 DVR35 as they were likely already present in MTC MRCA. Yet, we observed no case where  
366 a deletion concerned solely the DVR between these two copies.

367 Overall, the proportion of genomes containing either several copies of *IS6110* or a duplication  
368 of one of the forms listed above is important, showing that MTC CRISPR is much more  
369 variable than what could be derived from a standard 43 spacers spoligotyping analysis. This is  
370 true not only for the *in vitro* but also for the *in Silico*-based acquisition of the spoligotype, as  
371 the blast procedure used in the current analytic tools (Spolpred, SpoTyping) only provides  
372 information on the presence or absence of a given spacer: there is nothing quantitative or  
373 location-related in these approaches (Coll, et al., 2012; Xia, et al., 2016). Hence, on one hand,  
374 the representation of the CRISPR locus through a simple barcode of presence/absence of  
375 individual spacers hide these quantitative and localization information, whereas on another  
376 hand, a more extensive description of the CRISPR locus including duplications, insertions,  
377 point mutations, provides useful information to classify and/or cluster clinical isolates. Such  
378 an information is advantageously correlated with the current SNPs based taxonomical system  
379 of MTC genomes and enhance our understanding of isolates evolution (Coll, et al., 2014;  
380 Palittapongarnpim, et al., 2018; Shitikov, et al., 2017; Stucki, et al., 2016).

381 **Combined Mechanism of CRISPR locus reduction: how does *IS6110* contributes to the**  
382 **evolution of CRISPR locus in MTC?**

383 In addition to the undeniable expansion mechanisms mentioned above, CRISPR reduction  
384 mechanisms also coexist, which -to some extent- explain some of the spacer block deletions  
385 in MTC spoligotypes.

386 The first potential mechanism is the simple loss of spacer, for instance by recombination  
387 between two adjacent DRs. For instance, clinical isolate ERR1203071 of L4.8 lacks spacer 1.  
388 In place, it harbors a one nucleotide variant of the beginning sequence, a DR0 and spacer 2.  
389 The principle of parsimony here tends to suggest that a recombination between the DR0  
390 bordering spacer 1 led to this genotype. The same kind of recombination seems to occur on  
391 slightly higher number of DVR such as the DVR54-DVR61 deletion typical of L2-3-4-7.  
392 Recombination between perfect DR would be favored compared to mutated DR.

393 We can know confidently argue that the second highly frequent mechanism, that is at play for  
394 the largest suppressions of consecutive spacers, is an IS-linked three steps mechanism: (1)  
395 insertion or prior presence of a first copy of *IS6110* (for instance that after spacer 34), (2)  
396 insertion of a second *IS6110* copy at another location (e.g. in *csm6* in the ancestor of L2, also  
397 seen in SRR1710060, see **Supplementary file 2**), and (3) recombination between the two  
398 *IS6110* copies. This IS-mediated mechanism, that has been described in previous studies is a  
399 general mechanism, i.e. it happens independently of lineage and is the responsible of *IS6110*  
400 convergence of IS copy numbers (Roychowdhury, et al., 2015). The final result is the change  
401 from  $x$  to  $x-1$  copies of *IS6110*, with the loss of all spacers between the two copies. This  
402 mechanism can be observed independently of lineages, for example, in lineage 4, in Haarlem  
403 (4.1.2.1): L4 ancestor has a single copy of IS between 34 and 35, then a second copy occurred  
404 in the ancestor of Haarlem L4.1.2 isolates as seen in ERR552680, between 41 and 35, and  
405 finally a deletion occurred leading to the loss of spacers 35 to 41 for some isolates such as  
406 ERR234259. It therefore seems reasonable to think that after the insertion after spacer 41, this  
407 copy of *IS6110* has recombined with the one upstream of spacer 35. This mechanism is also at  
408 work elsewhere in the Haarlem isolates between *csm5* and spacer 34 and between *csm5* and  
409 spacer 41 (**Supplementary file 2**).

410 *IS6110* insertions can take place in spacers or in DR and it is not necessary for an IS to be in a  
411 DR to be able to recombine. For instance, in many L4.3 (LAM) clinical isolates where spacers  
412 31 to 34 (#21-#24) are missing, the successive sequences of interest are: the beginning of  
413 spacer 31 (#21), an *IS6110c*, DRb1 and spacer 35. The last three sequences of interest are  
414 found in the exact same order in undeleted isolates such as H37rv. This suggests that an  
415 *IS6110* copy was first inserted at the end of spacer 31, and that it later recombined with the

416 one located between spacers 34 and 35. This recombination did not modify the flanking  
417 sequences.

418 The orientation of the two *IS6110* copies that recombined cannot always be derived due to the  
419 lack of the ancestral versions. Still in several cases, we could identify isolates related to the  
420 deleted ones, that carry the two *IS6110* flanking the future deletion. This is true for the  
421 *IS6110* insertions having led to the deletion described in **Figure 4**. In that case, both  
422 insertions were in the reverse sense as compared to H37Rv orientation and can be called  
423 *IS6110c*. In another case, the isolate with two *IS6110* insertions is SRR5073887 (L4.4.1): it  
424 carries not only the standard *IS6110c* insertion between spacers 34 and 35 but also an *IS6110*  
425 insertion in the sense direction at the 439<sup>th</sup> nt of *csm6*. The deletion in ERR2653229 (also  
426 L4.4.1) flanked by the beginning of *csm6* and DRb1 and spacer 35 with a sense *IS6110*  
427 sequence in its middle (**Supplementary file 2** [IS6110 sheet]) likely occurred through the  
428 recombination of these two IS although they lie in opposite orientations. This phenomenon  
429 was recently observed in several cases of *IS6110* mediated deletions in L2 (Shitikov, et al.,  
430 2019) .

431

#### 432 **Variants and problems in spoligotyping**

433 How does the sequence diversity impact spoligotyping data? When performed *in vitro*,  
434 spoligotyping consists first in the amplification of the CRISPR locus using primers facing the  
435 outside of DR region, referred to as DRa and DRb, and second in the hybridization to probes  
436 attached at a specific position on a membrane or another support. CRISPR sequences variants  
437 may reduce the efficiency of the process, whether at the amplification or at the hybridization  
438 step. The presence of intermediate signals in spoligotyping or discrepant results between *in*  
439 *Silico* and *in Vitro*-based spoligotypes has been documented by several authors (Abadia, et al.,  
440 2011; Meehan, et al., 2018). We looked for intermediate signals corresponding to variants. In  
441 the case of L6 clinical isolates that carry a variant of spacer 4 (spacer 3 in spoligo-43  
442 nomenclature), we found no evidence of such report in the literature and in our own data (data  
443 not shown). The same was true for spacer 38 (spacer 28 in spoligo-43 nomenclature) found in  
444 L1.1.1 clinical isolates even if the mutation is relatively central in the probe (**Supplementary**  
445 **file 5**).

446



#### 447 **Asymmetric variations affecting of MTC CRISPR-Cas locus**

448 As described above, we identified punctual nucleotide mutations, duplications, IS insertions  
449 and deletions along CRISPR-Cas locus. CRISPR are oriented loci that acquire new spacers at  
450 the 5' end relative to their transcription direction (Barrangou, et al., 2007; Makarova, et al.,  
451 2018). It may therefore be expected that variations do not affect symmetrically this locus. To  
452 explore and understand the consequences of this possibility, it is important to identify the  
453 orientation of the CRISPR locus in question. Using RNAseq data on H37Rv, Wei et al.  
454 showed that transcription occurs from spacer 1 towards spacer 68 (Wei, et al., 2019). We  
455 independently confirmed this observation by the exploration of independent RNAseq data  
456 from (Ignatov, et al., 2015; Rodriguez, et al., 2014) (Refregier et al. unpublished results). The  
457 orientation presented in this study is thus the functional one. According to classical CRISPR  
458 expansion mechanism, the introduction of new spacers occurs at the 5' end of the locus, so  
459 that the most ancient DVR lies at its 3' end.

460 In contradiction with the remarkable feature that most ancient DR carry mutations in all  
461 isolates, no subregion exhibited a significantly higher punctual mutation rate (**Supplementary**  
462 **file 6**). The fact that the most ancient part of CRISPR locus does not carry a significantly  
463 higher number of punctual mutations as compared to parts that are more recent (spacer block  
464 deletions), may suggest that the time during which the locus expanded from spacer 68 to  
465 spacer 1 may be negligible as compared to the time between MTC MRCA and present, or that  
466 the CRISPR locus was transferred by lateral gene transfer in one single block from another  
467 environmental organism. Alternatively, the time of CRISPR locus expansion could have been  
468 quite long, however the pace of CRISPR locus SNPs mutations acquisition was very slow  
469 because of an extremely slow pace of MTC transmission. Demography and genetic drift  
470 could have been much more important for MTC evolution than selection in human  
471 populations (Pepperell, et al., 2010). Yet, the presence of mutations in several DR at the 3'  
472 end of the locus could also play a role in its stability.

473 In contrast, we detected an asymmetry concerning the loss of flanking sequences: it was  
474 apparently more frequent to have a loss of the beginning sequences of CRISPR, on the side of  
475 the *cas* genes (several independent isolates from L2 and from L4) than to have a loss of the  
476 ending sequences, i.e. on the side of *Rv2813*. All deletions implicating flanking sequences  
477 were bordered by an *IS6110* sequence. Altogether, the asymmetry in deletion suggests either a  
478 more crucial role of the end of the CRISPR *i.e.* of gene *Rv2813* and/or its neighbors, or  
479 asymmetric mechanisms favoring deletion on the *cas* gene side. This second possibility



480 relates to IS6110 insertion frequency as IS are always involved in large deletions. Saying that  
481 IS6110 insertions are more likely on the *cas* gene side suggests either their lower impact on  
482 bacterial fitness, or a DNA superstructure that would favor IS insertions. Other IS exist in the  
483 genome that could also insert in a favorable region. Their presence in CRISPR region would  
484 be a sign that it is an integration hot spot. However, our script was designed to look only for  
485 insertion in *cas* gene that also lead to a deletion in the CRISPR in at least one of the explored  
486 sample. IS other than IS6110 cannot lead to any deletion. Nevertheless, even if our script may  
487 have overlooked non-IS6110 insertions, we did not encounter it in around 500 randomly  
488 sampled genomes. The question of *cas* gene locus being an integration hotspot of IS  
489 sequences needs other studies to be completely solved.

490

#### 491 **Functionality of MTC CRISPR-Cas locus**

492 CRISPR-Cas loci are involved in two mechanisms: 1) adaptation by the integration of new  
493 spacers, usually taken from foreign DNA, at the 5' end of CRISPR with the help of Cas1 and  
494 Cas2 proteins, and 2) immunity by the transcription of CRISPR locus, processing with the  
495 help of Cas6 protein in the case of type III-A CRISPRs, and degradation of DNA and/or RNA  
496 carrying *protospacers*, with the help of the crRNP (CRISPR RiboNucleoProtein complex), a  
497 complex involving the crRNA and other Cas proteins. By exploring the diversity of many  
498 genomes at the CRISPR locus, we are able to infer the effectivity of adaptation processes.  
499 Regarding immunity, we can only state whether the necessary genes are present or not.

500 In the whole *M. tuberculosis* complex *sensu stricto*, we could find only the 68 spacers already  
501 present in the MRCA (van Embden, et al., 2000). We found no evidence that a single clinical  
502 isolate has acquired a new spacer in the course of MTC evolution. This seems particularly  
503 surprising as most currently spreading isolates apart those from L2 still carry the full set of  
504 *Cas* genes including *Cas1* and *Cas 2* involved in CRISPR adaptation in other type III-A  
505 systems. This could be due to a mutation in *M. tuberculosis* ancestor that has abolished *Cas1*  
506 and/or *Cas2* functionality in the ancestor. Another reason could be that MTC, given its intra-  
507 cellular life-style, does simply not have the chance anymore to encounter foreign DNA such  
508 as phages or plasmids. These two phenomena could also be linked: a loss of functionality of  
509 *Cas1* and *Cas2* in the MRCA of all MTC could have fostered an adaptative change in life-  
510 style of the bacterium, *i.e.* from an environmental extracellular to a host-specialized  
511 intracellular life-style. Such an hypothesis could be supported by the evolution of the CRISPR

512 locus of *Vibrio cholerae*, with observations that the recent pandemic strains have lost their  
513 ancestral CRISPR locus (Weill, et al., 2017) and (FX Weill, personal communication). Hence,  
514 the functionality of *Cas1* and *Cas2* of MTC remains to be explored.

515 Regarding immunity, this study only focused on the full presence or absence of *cas* genes  
516 without exploring in detail SNP variations. As stated previously, 23/198 (12%) lacked at least  
517 part of the *cas* genes. Among these yet, all isolates still carried the *cas6*, *cas10/csm1*, *csm2*,  
518 and *csm3* genes. This observation matches that made previously on CRISPR clinical isolates  
519 (Freidlin, et al., 2017). *Cas6* protein is involved in pre-crRNA processing. *Cas10/Csm1* and  
520 *Csm3* are the enzymes responsible for the catalytic activity of the crRNP (Kazlauskienė, et al.,  
521 2017; Samai, et al., 2015). Hence, regarding immunity, even if the spatial structure of the  
522 crRNP may be impaired by the absence of *csm4* and/or *csm5* in some isolates, it could remain  
523 possible that immunity occurs in all MTC isolates through the consecutive actions of *Cas6* to  
524 process pre-crRNA and of *Cas10/Csm1* and *Csm3* to degrade DNA and/or RNA. The fact that  
525 none of the spacer is conserved in all isolates implies that, if immunity occurs, it does not  
526 always target the same DNA and/or RNA sequences.

527

## 528 **Global Implication of CRISPR diversity for the understanding of MTC clinical isolates** 529 **evolution**

530 In MTC, the CRISPR locus is a likely witness of a previous yet unknown evolutionary history  
531 of phage DNA invaders defense, whereas *IS6110* is a specific MTC element that belongs to  
532 the IS3 family that, through transposition, also plays a permanent role in shaping MTC  
533 genomes (Thabet and Souissi, 2017). The link between the two in evolutionary genomics  
534 remains poorly investigated until now. MTC genome actually contains a lot of other IS and  
535 transposases (88 genes retrieved in mycobrowser, (<https://mycobrowser.epfl.ch/>) such as  
536 *IS1081*, *IS1533*, *IS1547*, *IS1560*), but *IS6110* is the one with the largest number of copies in  
537 most isolates and especially in the reference isolate H37Rv (Cole, et al., 1998). *IS1547* was  
538 previously shown to play a role in MTC evolution however it remains poorly investigated  
539 (Fang, et al., 1999). *IS6110*-RFLP was the golden standard to define epidemiological clusters  
540 at the end of the nineties and stayed so during around 20 years, until it was replaced by  
541 MIRU-VNTR<sup>1</sup> and more recently by Whole-Genome-Sequencing (Schurch, et al., 2010;  
542 Supply, et al., 2006; van Embden, et al., 1993; van Soolingen, et al., 2007) (for a recent

---

<sup>1</sup> Mycobacterial Interspersed Repetitive Units-Variable Number of Tandem Repeats Typing

543 review on evolution of TB molecular epidemiological methods, see also (Garcia De Viedma  
544 and Perez-Lago, 2018)). Previous results on *IS6110* insertion sites have shown that  
545 independent *IS6110* copy acquisition through transposition into *hot-spots* was a common  
546 mechanism explaining convergence in *IS6110* copy number in some of the MTBC  
547 sublineages (Dale, et al., 2003; Roychowdhury, et al., 2015). A recent paper on the micro- and  
548 macro-evolution of Lineage 2 of MTC in relation to *IS6110* transposition also stress the  
549 interest of such studies using WGS (Shitikov, et al., 2019). The role of the *ipl* (Insertion  
550 Preference Locus) was also stressed long time ago and showed consequences on the CRISPR  
551 locus (Fang, et al., 1999; Fang, et al., 1999; Fang and Forbes, 1997), however no generalized  
552 observations on IS-CRISPR genomics dynamics had been done so far before this study.

553

## 554 **Conclusions**

555 Our study, by providing an *in-depth* reconstruction of the CRISPR locus of MTC using short  
556 reads on around 200 genomes, in combination with *IS6110*, improves our knowledge on the  
557 structure of the CRISPR locus and sheds new light on the general evolutionary mechanisms  
558 acting on MTC genomes through a first yet quantitatively limited analysis that combines  
559 CRISPR-IS combined evolutionary dynamics. By unveiling an unexpected genetic diversity  
560 of the CRISPR Locus on MTC, our study opens the way to new in-depth congruence analysis  
561 between SNP-based and repetitive sequence based MTC phylogenies. Such deeper knowledge  
562 on the natural history of tuberculosis will help us deciphering the most important key  
563 evolutionary events that shaped today's global and local MTC genomes population structure.

## 564 **Declarations**

565

### 566 **Ethics approval and consent to participate**

567 N.A. This study only uses publicly available data

### 568 **Consent for publication**

569 All authors read and accepted the final submitted version

### 570 **Competing interests**

571 The authors declare no competing interest

## 572 **Funding**

573 This study was funded by CNRS (Centre National de la Recherche Scientifique), The  
574 University of Paris-Saclay and the University of Bourgogne Franche-Comté through  
575 recurrent research support to the research teams.

## 576 **Authors' contributions**

577 CG, GR, CS conceived the study. CG developed the pipeline, GC,GR,CS chose the  
578 genomes to be analyzed, GR and CG analyzed results helped by CS; GR, CS and CG  
579 wrote the manuscript, GR drew the Figures and built the Supplementary Tables;

## 580 **Acknowledgements**

581 Laura Morel, Valentin Pohyer, Matthieu Petrou, three previous undergraduates  
582 students who contribute to the start of the MTC CRISPR genome project are warmly  
583 acknowledged

## 584 **Data and Material availability**

585 All genomic data used were extracted from Public genome databases (NCBI or ENA  
586 archives). Computer Program specifically developed in this paper will be made freely  
587 available upon request to Christophe Guyeux ([christophe.guyeux@univ-fcomte.fr](mailto:christophe.guyeux@univ-fcomte.fr)).

588

## 589 **References**

590 Abadia, E., *et al.* The use of microbead-based spoligotyping for Mycobacterium tuberculosis complex  
591 to evaluate the quality of the conventional method: providing guidelines for Quality Assurance when  
592 working on membranes. *BMC Infect Dis* 2011;11:110.  
593 Barrangou, R., *et al.* CRISPR provides acquired resistance against viruses in prokaryotes. *Science*  
594 2007;315(5819):1709-1712.  
595 Blouin, Y., *et al.* Significance of the Identification in the Horn of Africa of an Exceptionally Deep  
596 Branching Mycobacterium tuberculosis Clade. *PLoS One* 2012;7(12):e52841.

597 Brudey, K., *et al.* Mycobacterium tuberculosis complex genetic diversity : mining the fourth  
598 international spoligotyping database (SpolDB4) for classification, Population Genetics, and  
599 Epidemiology. *BMC Microbiol.* 2006;6(6):23.  
600 Cole, S.T., *et al.* Deciphering the biology of Mycobacterium tuberculosis from the complete genome  
601 sequence. *Nature* 1998;393(6685):537-544.  
602 Coll, F., *et al.* SpolPred: rapid and accurate prediction of Mycobacterium tuberculosis spoligotypes  
603 from short genomic sequences. *Bioinformatics* 2012;28(22):2991-2993.  
604 Coll, F., *et al.* A robust SNP barcode for typing Mycobacterium tuberculosis complex strains. *Nature*  
605 *communications* 2014;5:4812.  
606 Coll, F., *et al.* PolyTB: A genomic variation map for Mycobacterium tuberculosis. *Tuberculosis (Edinb)*  
607 2014;94(3):346-54(3):346-354.  
608 Comas, I., *et al.* Genotyping of genetically monomorphic bacteria: DNA sequencing in Mycobacterium  
609 tuberculosis highlights the limitations of current methodologies. *PLoS One* 2009;4(11):e7815.  
610 Consortium, C., *et al.* Prediction of Susceptibility to First-Line Tuberculosis Drugs by DNA Sequencing.  
611 *N Engl J Med* 2018;379(15):1403-1415.  
612 Couvin, D., *et al.* CRISPRCasFinder, an update of CRISPRFinder, includes a portable version, enhanced  
613 performance and integrates search for Cas proteins. *Nucleic Acids Res* 2018.  
614 Couvin, D., *et al.* Macro-geographical specificities of the prevailing tuberculosis epidemic as seen  
615 through SITVIT2, an updated version of the Mycobacterium tuberculosis genotyping database. *Infect*  
616 *Genet Evol* 2018.  
617 Dale, J.W., *et al.* Evolutionary relationships amongst isolates of *Mycobacterium tuberculosis* with few  
618 copies of IS6110. *J. Bacteriol.* 2003;185(8):2555-2562.  
619 Fabre, L., *et al.* CRISPR typing and subtyping for improved laboratory surveillance of Salmonella  
620 infections. *PLoS One* 2012;7(5):e36995.  
621 Fang, Z., *et al.* IS6110-mediated deletions of wild-type chromosomes of Mycobacterium tuberculosis.  
622 *Journal of bacteriology* 1999;181(3):1014-1020.  
623 Fang, Z., *et al.* Characterization of IS1547, a new member of the IS900 family in the Mycobacterium  
624 tuberculosis complex, and its association with IS6110. *Journal of bacteriology* 1999;181(3):1021-  
625 1024.  
626 Fang, Z. and Forbes, K.J. A Mycobacterium tuberculosis IS6110 preferential locus (ipl) for insertion  
627 into the genome. *J Clin Microbiol* 1997;35(2):479-481.  
628 Filliol, I., *et al.* Snapshot of moving and expanding clones of Mycobacterium tuberculosis and their  
629 global distribution assessed by spoligotyping in an international study. *J Clin Microbiol*  
630 2003;41(5):1963-1970.  
631 Freidlin, P.J., *et al.* Structure and variation of CRISPR and CRISPR-flanking regions in deleted-direct  
632 repeat region Mycobacterium tuberculosis complex strains. *BMC genomics* 2017;18(1):168.  
633 Gagneux, S. Host-pathogen coevolution in human tuberculosis. *Philosophical transactions of the*  
634 *Royal Society of London. Series B, Biological sciences* 2012;367(1590):850-859.  
635 Garcia De Viedma, D. and Perez-Lago, L. The Evolution of Genotyping Strategies To Detect, Analyze,  
636 and Control Transmission of Tuberculosis. *Microbiology spectrum* 2018;6(5).  
637 Gonzalo-Asensio, J., *et al.* New insights into the transposition mechanisms of IS6110 and its dynamic  
638 distribution between Mycobacterium tuberculosis Complex lineages. *PLoS genetics*  
639 2018;14(4):e1007282.  
640 Grissa, I., *et al.* On-line resources for bacterial micro-evolution studies using MLVA or CRISPR typing.  
641 *Biochimie* 2008;90(4):660-668.  
642 Grissa, I., Vergnaud, G. and Pourcel, C. The CRISPRdb database and tools to display CRISPRs and to  
643 generate dictionaries of spacers and repeats. *BMC Bioinformatics* 2007;8:172.  
644 Grissa, I., Vergnaud, G. and Pourcel, C. CRISPRFinder: a web tool to identify clustered regularly  
645 interspaced short palindromic repeats. *Nucleic Acids Res* 2007;35(Web Server issue):W52-57.  
646 Groenen, P.M., *et al.* Nature of DNA polymorphism in the direct repeat cluster of Mycobacterium  
647 tuberculosis; application for strain differentiation by a novel typing method. *Molecular microbiology*  
648 1993;10(5):1057-1065.

- 649 Guyeux, C., Sola, C. and Refrégier, G. Exhaustive reconstruction of the CRISPR locus in *M. tuberculosis*  
650 complex using short reads *Bioinformatics* 2019a;submitted.
- 651 Hershberg, R., *et al.* High functional diversity in *Mycobacterium tuberculosis* driven by genetic drift  
652 and human demography. *PLoS biology* 2008;6(12):e311.
- 653 Ignatov, D.V., *et al.* Dormant non-culturable *Mycobacterium tuberculosis* retains stable low-  
654 abundant mRNA. *BMC genomics* 2015;16:954.
- 655 Ishino, Y., *et al.* Nucleotide sequence of the *iap* gene, responsible for alkaline phosphatase isozyme  
656 conversion in *Escherichia coli*, and identification of the gene product. *Journal of bacteriology*  
657 1987;169(12):5429-5433.
- 658 Jajou, R., *et al.* Epidemiological links between tuberculosis cases identified twice as efficiently by  
659 whole genome sequencing than conventional molecular typing: A population-based study. *PLoS One*  
660 2018;13(4):e0195413.
- 661 Jansen, R., *et al.* Identification of genes that are associated with DNA repeats in prokaryotes.  
662 *Molecular microbiology* 2002;43(6):1565-1575.
- 663 Kamerbeek, J., *et al.* Simultaneous detection and strain differentiation of *Mycobacterium*  
664 tuberculosis for diagnosis and epidemiology. *J Clin Microbiol* 1997;35(4):907-914.
- 665 Kato-Maeda, M., *et al.* Strain classification of *Mycobacterium tuberculosis*: congruence between  
666 large sequence polymorphisms and spoligotypes. *Int J Tuberc Lung Dis* 2011;15(1):131-133.
- 667 Kazlauskiene, M., *et al.* A cyclic oligonucleotide signaling pathway in type III CRISPR-Cas systems.  
668 *Science* 2017;357(6351):605-609.
- 669 Maeda, S., *et al.* Genotyping of *Mycobacterium tuberculosis* spreading in Hanoi, Vietnam using  
670 conventional and whole genome sequencing methods. *Infection Genetics Evolution* 2020;78:104107.
- 671 Makarova, K.S., *et al.* An updated evolutionary classification of CRISPR-Cas systems. *Nature reviews.*  
672 *Microbiology* 2015;13(11):722-736.
- 673 Makarova, K.S., Wolf, Y.I. and Koonin, E.V. Classification and Nomenclature of CRISPR-Cas Systems:  
674 Where from Here? *CRISPR J* 2018;1(5):325-336.
- 675 Meehan, C.J., *et al.* The relationship between transmission time and clustering methods in  
676 *Mycobacterium tuberculosis* epidemiology. *EBioMedicine* 2018;37:410-416.
- 677 Mulholland, C.V., *et al.* Dispersal of *Mycobacterium tuberculosis* driven by historical european trade  
678 in the South Pacific. *Frontiers in microbiology* 2019;doi: 10.3389/fmicb.2019.02778.
- 679 Ngabonziza, J.C.S., *et al.* An ancestral lineage of the *Mycobacterium tuberculosis* complex discovered  
680 near the African Great Lakes, missing link between *M. canettii* and *M. tuberculosis sensu stricto*. In,  
681 *European Society Microbiology Congress*. Valencia; 2019.
- 682 Palittapongarnpim, P., *et al.* Evidence for Host-Bacterial Co-evolution via Genome Sequence Analysis  
683 of 480 Thai *Mycobacterium tuberculosis* Lineage 1 Isolates. *Scientific reports* 2018;8(1):11597.
- 684 Pepperell, C., *et al.* Bacterial genetic signatures of human social phenomena among *M. tuberculosis*  
685 from an Aboriginal Canadian population. *Molecular biology and evolution* 2010;27(2):427-440.
- 686 Pourcel, C., Salviñol, G. and Vergnaud, G. CRISPR elements in *Yersinia pestis* acquire new repeats by  
687 preferential uptake of bacteriophage DNA, and provide additional tools for evolutionary studies.  
688 *Microbiology* 2005;151(Pt 3):653-663.
- 689 Rodriguez, J.G., *et al.* Global adaptation to a lipid environment triggers the dormancy-related  
690 phenotype of *Mycobacterium tuberculosis*. *mBio* 2014;5(3):e01125-01114.
- 691 Roychowdhury, T., Mandal, S. and Bhattacharya, A. Analysis of IS6110 insertion sites provide a  
692 glimpse into genome evolution of *Mycobacterium tuberculosis*. *Scientific reports* 2015;5:12567.
- 693 Samai, P., *et al.* Co-transcriptional DNA and RNA Cleavage during Type III CRISPR-Cas Immunity. *Cell*  
694 2015;161(5):1164-1174.
- 695 Schurch, A.C., *et al.* High resolution typing by integration of genome sequencing data in a large  
696 tuberculosis cluster. *J Clin Microbiol* 2010;48(9):3403-3406.
- 697 Schurch, A.C., *et al.* The tempo and mode of molecular evolution of *Mycobacterium tuberculosis* at  
698 patient-to-patient scale. *Infect Genet Evol* 2010;10(1):108-114.

699 Shitikov, E., *et al.* The role of IS6110 in micro- and macroevolution of *Mycobacterium tuberculosis*  
700 lineage 2. *Molecular phylogenetics and evolution* 2019;139:106559.  
701 Shitikov, E., *et al.* Evolutionary pathway analysis and unified classification of East Asian lineage of  
702 *Mycobacterium tuberculosis*. *Scientific reports* 2017;7(1):9227.  
703 Stucki, D., *et al.* *Mycobacterium tuberculosis* lineage 4 comprises globally distributed and  
704 geographically restricted sublineages. *Nature genetics* 2016;48(12):1535-1543.  
705 Supply, P., *et al.* Proposal for standardization of optimized mycobacterial interspersed repetitive unit-  
706 variable-number tandem repeat typing of *Mycobacterium tuberculosis*. *J Clin Microbiol*  
707 2006;44(12):4498-4510.  
708 Supply, P., *et al.* Genomic analysis of smooth tubercle bacilli provides insights into ancestry and  
709 pathoadaptation of *Mycobacterium tuberculosis*. *Nature genetics* 2013;45(2):172-179.  
710 Thabet, S. and Souissi, N. Transposition mechanism, molecular characterization and evolution of  
711 IS6110, the specific evolutionary marker of *Mycobacterium tuberculosis* complex. *Mol Biol Rep*  
712 2017;44(1):25-34.  
713 Thierry, D., *et al.* IS6110, an IS-like element of *Mycobacterium tuberculosis* complex. *Nucleic. Acids.*  
714 *Res.* 1990;18:188.  
715 van Belkum, A., *et al.* short-sequence DNA repeats in prokaryotic genomes. *MMBR* 1998;62:275-293.  
716 van Embden, J.D., *et al.* Strain identification of *Mycobacterium tuberculosis* by DNA fingerprinting:  
717 recommendations for a standardized methodology. *J Clin Microbiol* 1993;31(2):406-409.  
718 van Embden, J.D.A., *et al.* Genetic variation and evolutionary origin of the Direct repeat locus of  
719 *Mycobacterium tuberculosis* complex bacteria. *J. Bacteriol.* 2000;182:2393-2401.  
720 van Soolingen, D., *et al.* A novel pathogenic taxon of the *Mycobacterium tuberculosis* complex,  
721 Canetti: characterization of an exceptional isolate from Africa. *Int J Syst Bacteriol* 1997;47(4):1236-  
722 1245.  
723 van Soolingen, D., Kremer, K. and W.M., H.P. Molecular Epidemiology: Breakthrough Achievements  
724 and Future Prospects. In: Amadeo, editor, *Tuberculosis 2007 : from basic science to patient care*  
725 Amadeo; 2007. p. Chapter 9.  
726 Wei, J., *et al.* The *Mycobacterium tuberculosis* CRISPR-Associated Cas1 Involves Persistence and  
727 Tolerance to Anti-Tubercular Drugs. *Biomed Res Int* 2019;2019:7861695.  
728 Weill, F.X., *et al.* Genomic history of the seventh pandemic of cholera in Africa. *Science*  
729 2017;358(6364):785-789.  
730 Xia, E., Teo, Y.Y. and Ong, R.T. SpoTyping: fast and accurate in silico *Mycobacterium* spoligotyping  
731 from sequence reads. *Genome medicine* 2016;8(1):19.

732

733

734



735 **Figure legends**

736 **Figure 1 – Cumulative number of spacers along random sampling of our database.**

737 **Figure 2 – CRISPR-Cas locus reconstitution for one archetypal isolate of each lineage.**

738 *Notes common to fig. 2 and 3:*

739 Arrows indicate genes. Diamonds indicate spacers. Boxes indicated Direct Repeats (DR).  
740 Width of spacers are DR has been artificially expanded for clarity. The pink empty box  
741 highlights a duplicated spacer at an unexpected position (not in tandem).

742 Color codes for genes (arrows): light blue: *cas* genes involved in immunity (interference);  
743 dark blue: *cas* genes involved in adaptation; green : *IS6110* genes (transposase and  
744 hypothetical protein); white: other neighbouring gene of unknown function.

745 The color of spacers was attributed randomly to facilitate visual exploration but spacers of the  
746 same color have no link except if they carry the same number.

747 Direction of CRISPR-Cas locus is antisense as compared to H37Rv genome orientation, so  
748 that all *cas* genes are annotated with a c: *cas6* is Rv2824c and *cas2* is Rv2816c. Genes  
749 forming the *IS6110* sequence are sometimes in the sense and sometimes in the antisense  
750 direction. Between spacers 34 and 35 as in H37Rv, there are in the antisense direction and  
751 therefore are referred to as Rv2815c and Rv2814c.

752 Several DRs are truncated. Between spacers 34 and 35, *IS6110c* is preceded by a sequence  
753 close to rDra, corresponding to the 19 first nt of DR0 (shown in light grey), and is followed  
754 by a sequence close to Drb (referred to as DRb1) corresponding to the 20 last nt of DR0  
755 (darker grey). These two sequences therefore share the CCC sequence in the middle of DR0.  
756 They are also found around the *IS6110c* sequence of L7 isolates. A similar case is true in L5.1  
757 ERR7022419 clinical isolates. Around the *IS6110c* copy in ERR234109 (L3), the preceding  
758 spacer is slightly truncated (sp33, only its first 27 nt), and there are only the last 4 nucleotide  
759 of the DR0 before the next spacer (sp45).

760 When a DR0 borders a deletion, we chose to represent it in most of the cases at the beginning  
761 of the deletion, although choosing the end of the deletion would have been equally relevant.

762 Mutated DR are indicated in black. They are not the same from one position to the other, but  
763 variants at the same location are the same except for the DR between spacers 67 and 68 that

764 harbors a second variant solely in L6 and is therefore indicated by a star (see Supplementary  
765 file 3).

766 **Figure 3 – Proof for spacers 14-20 duplication in isolate ERR718201.** Reads number as a  
767 function of spacer number is shown in blue. The number of the following spacer is shown in  
768 red (crosses).

769 **Figure 4 – CRISPR substructures of related isolates illustrating deletion by**  
770 **recombination between IS6110 copies.** ERR072087 with one single copy with all spacers in  
771 the subregion of interest likely harbors the most ancestral structure. ERR552680 with two  
772 copies and all spacers likely represents an intermediate state after a new IS6110 insertion.  
773 ERR234259 with a single copy and loss of spacers likely emerged due to the recombination  
774 between the two copies present in ERR552680.

775

776 **Figure 5 – CRISPR-Cas locus likely structure of each lineage MRCA**

777 The proposed structure was designed by a parsimonious approach based on the CRISPR  
778 structure of the 198 clinical isolates fully characterized in Supplementary file 3 (See also  
779 notes common with Fig. 2).

780 .

781

782

783 **Supplementary files**

784 Supplemental file 1 (doc) - Sequences of interest in CRISPR-Cas region of *Mycobacterium*  
785 *tuberculosis* complex.

786 Supplemental file 2 (tab) – CRISPR reconstructions highlighting 1) global structure and  
787 position of IS6110 insertions ['IS6110' sheet]; 2) spacer variants ['spacer' sheet]; 3) DR  
788 variants ['DR' sheet]; 4) Duplicated DVR ['Duplic' sheet].

789 Supplemental file 3 – Exploration of read numbers for the reconstruction and identification of  
790 duplications, the case of ERR718197.

791 Supplemental file 4 – Confirmation of sp35 presence after spacer 41 in two Sequence runs  
792 from clinical isolates belonging to L5 and L2 respectively

793 Supplemental file 5 - Spacer 4, spacer 6 and spacer 38 variants in parallel with 43-spacers  
794 spoligotyping probes

795 Supplemental file 6 – Cumulative punctual variant numbers 5DR variants + spacer variants)  
796 in groups of 5 successive DVR from DVR1-5 to the last three DVR (DVR66-68)

797

798

799

800

801

ulative spacer number

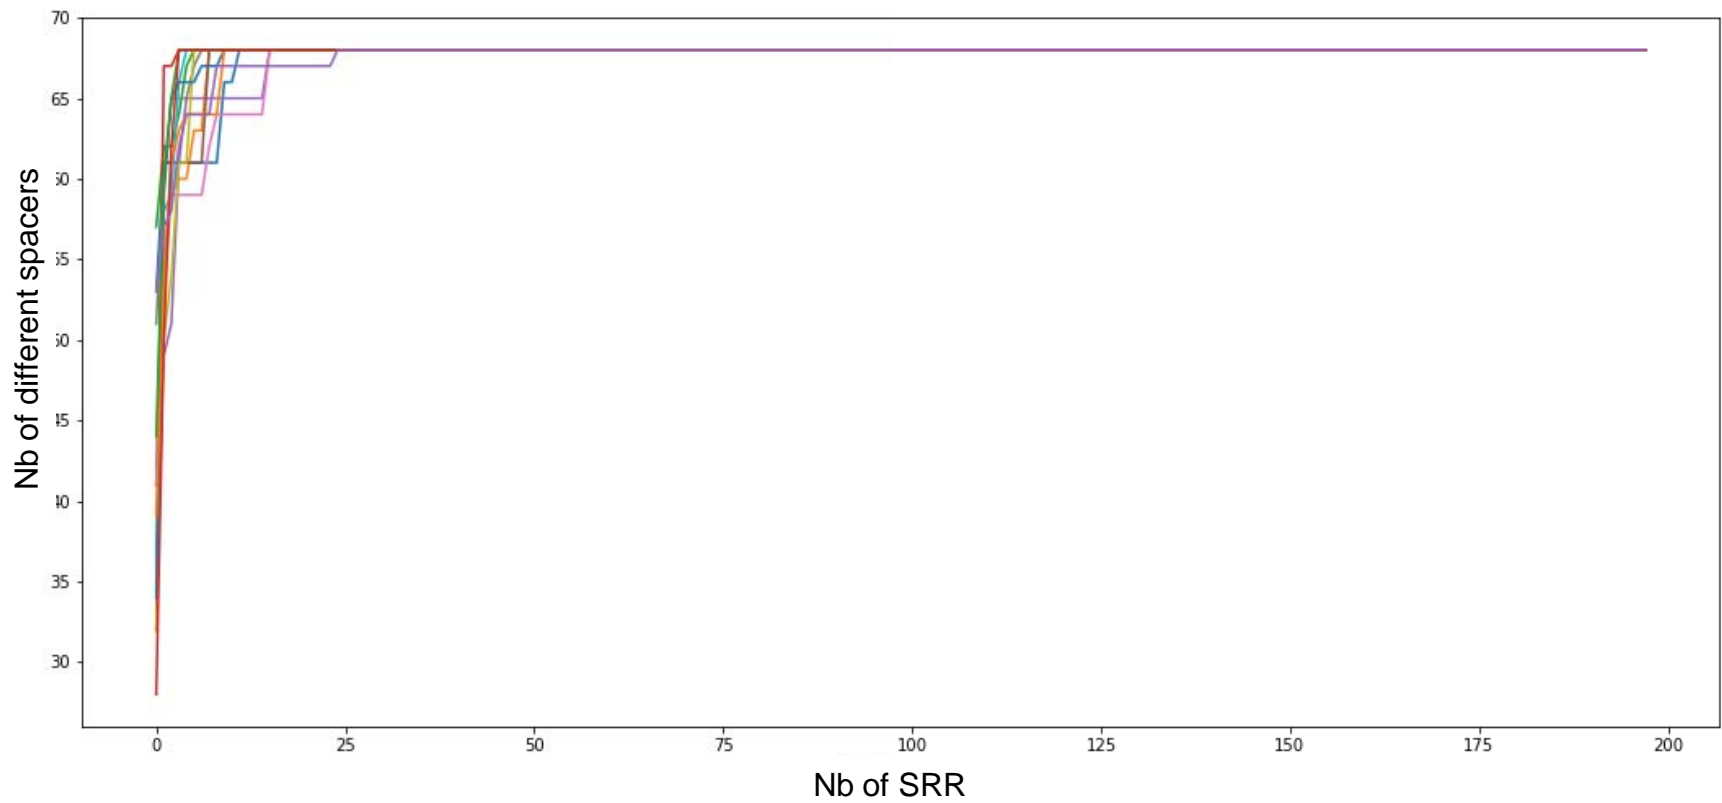

Fig2. Reconstitution of CRISPR-Cas locus for one archetypal isolate of each lineage

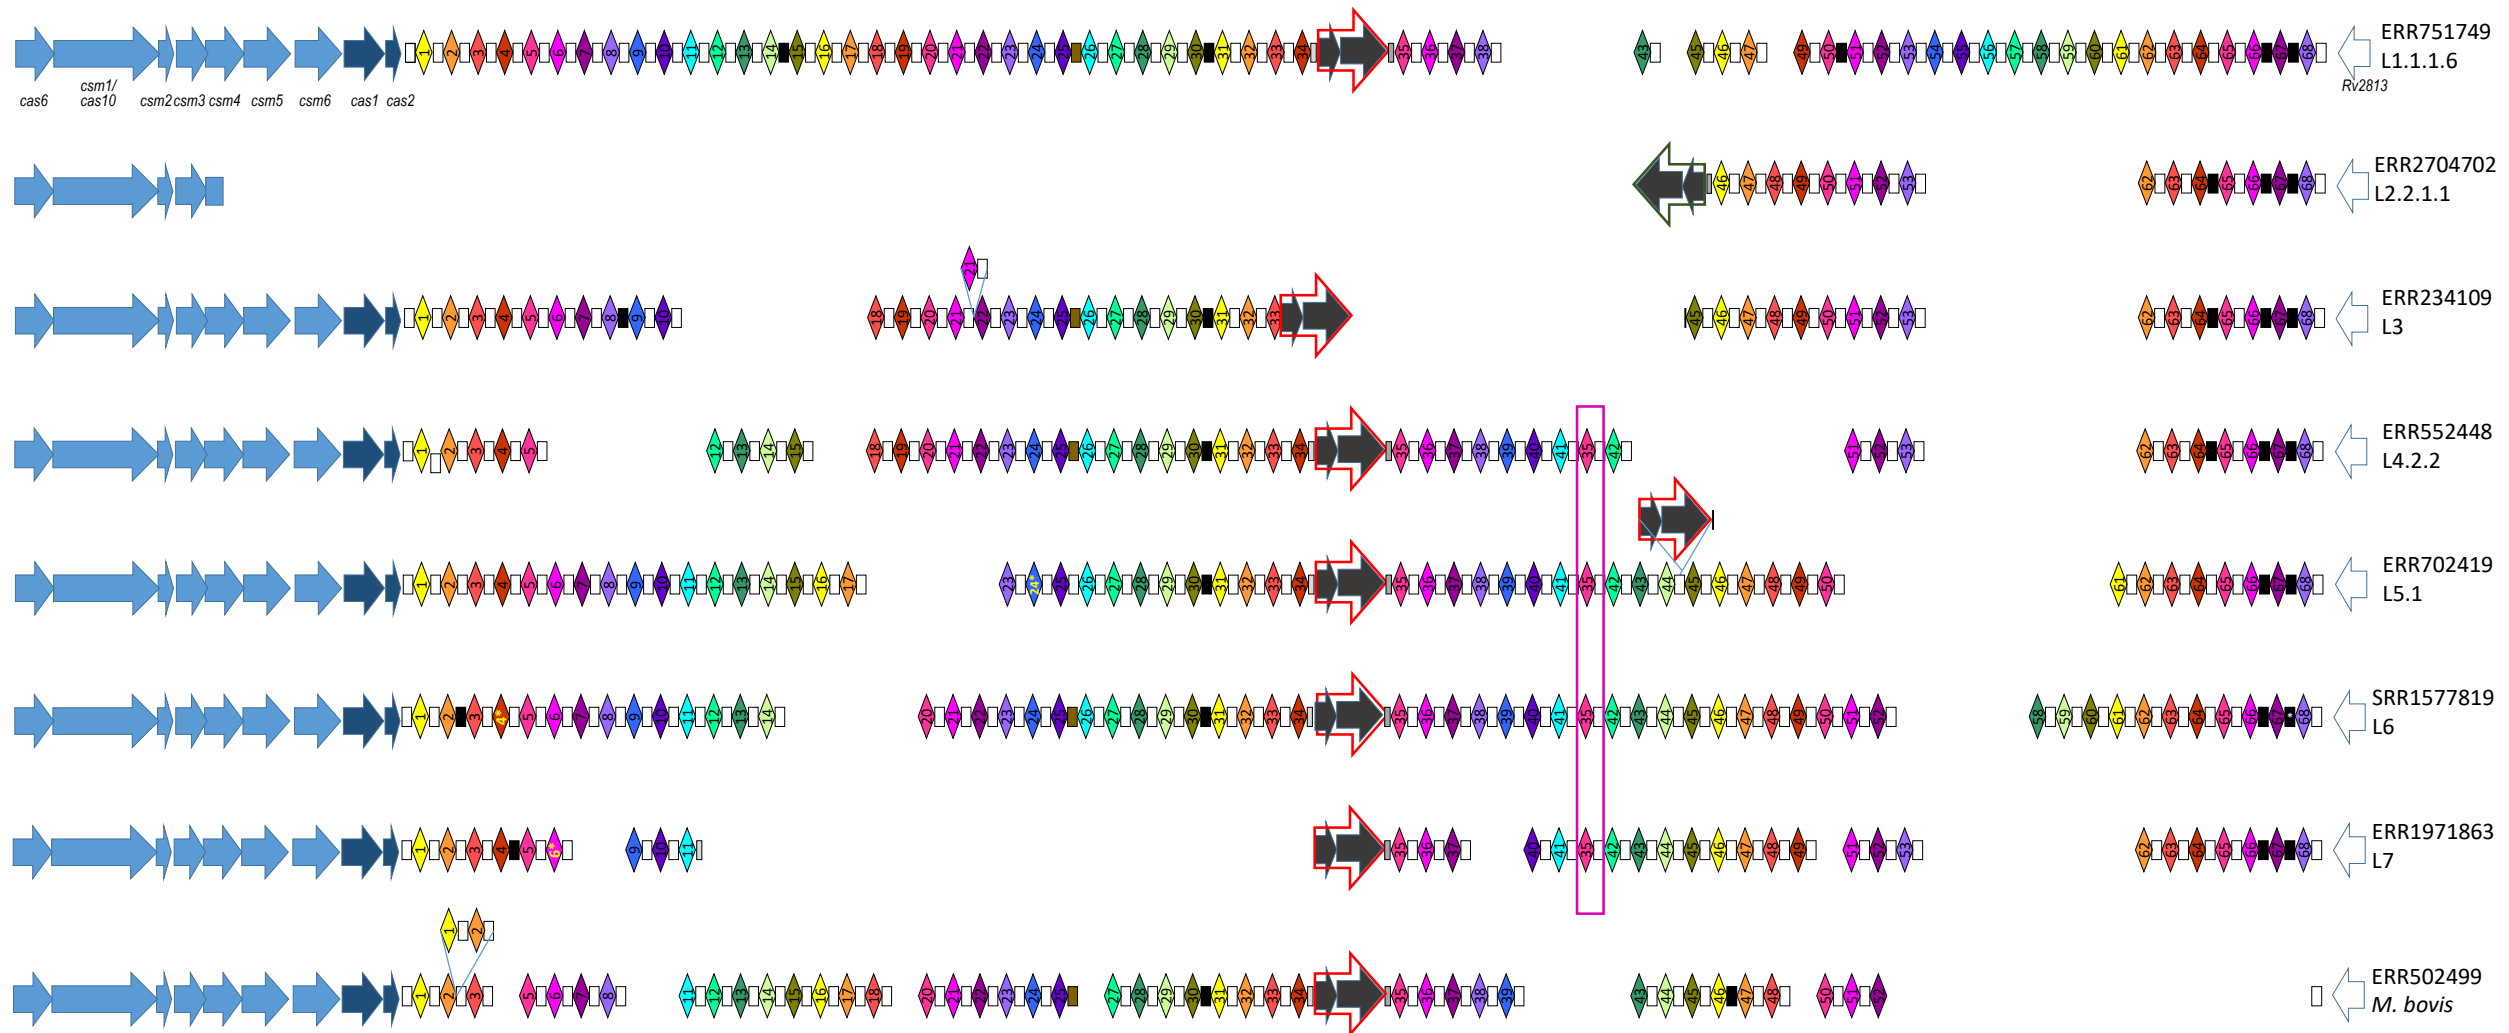

**Fig. 3 – Proof for spacers 14-20 duplication in isolate ERR718201.** Reads number as a function of spacer number are shown in blue. The number of the following spacer is shown in red (crosses).

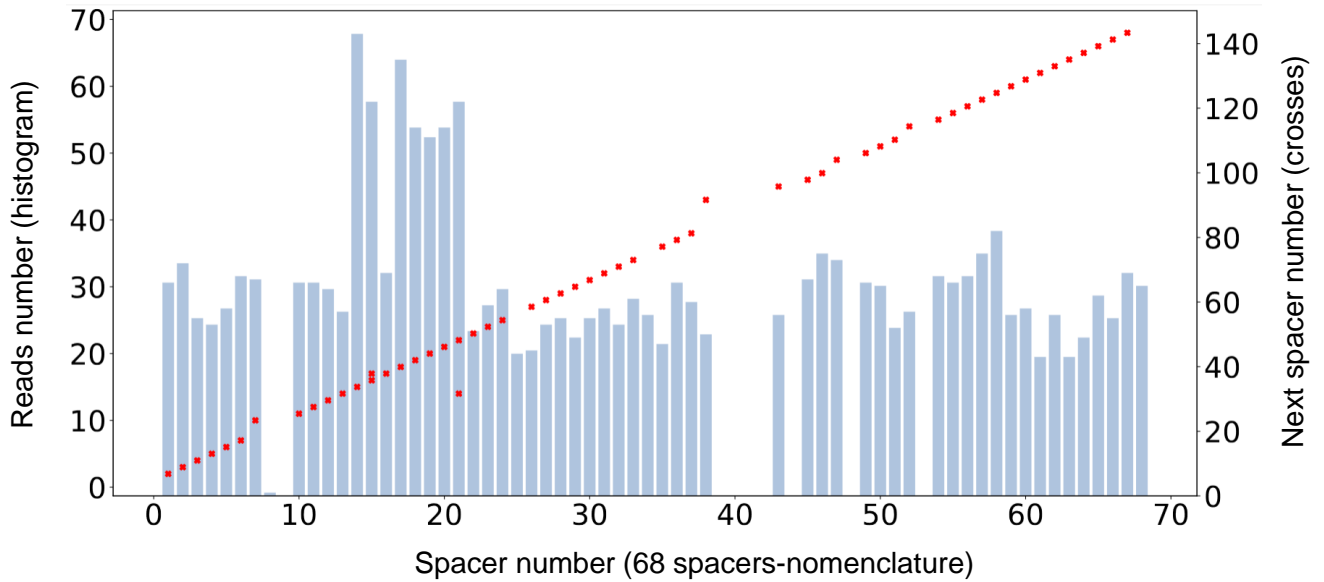

**Figure 4 – CRISPR substructures of related isolates illustrating deletion by recombination between IS6110 copies.** ERR072087 with one single copy with all spacers in the subregion of interest likely harbors the most ancestral structure. ERR552680 with two copies and all spacers likely represents an intermediate state after a new IS6110 insertion. ERR234259 with a single copy and loss of spacers likely emerged due to the recombination between the two copies present in ERR552680.

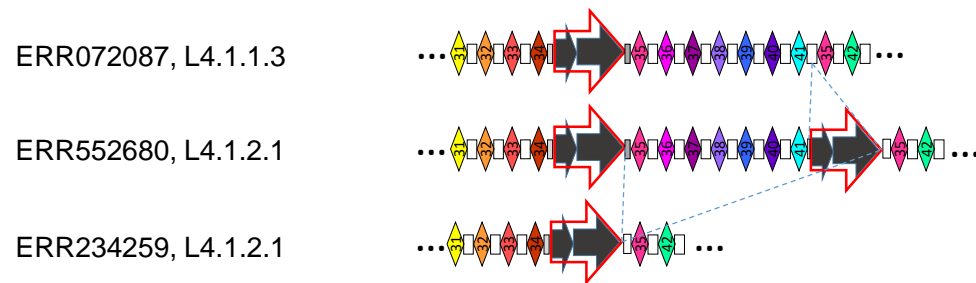



**Figure 5 – CRISPR-Cas locus likely structure of each lineage MRCA**

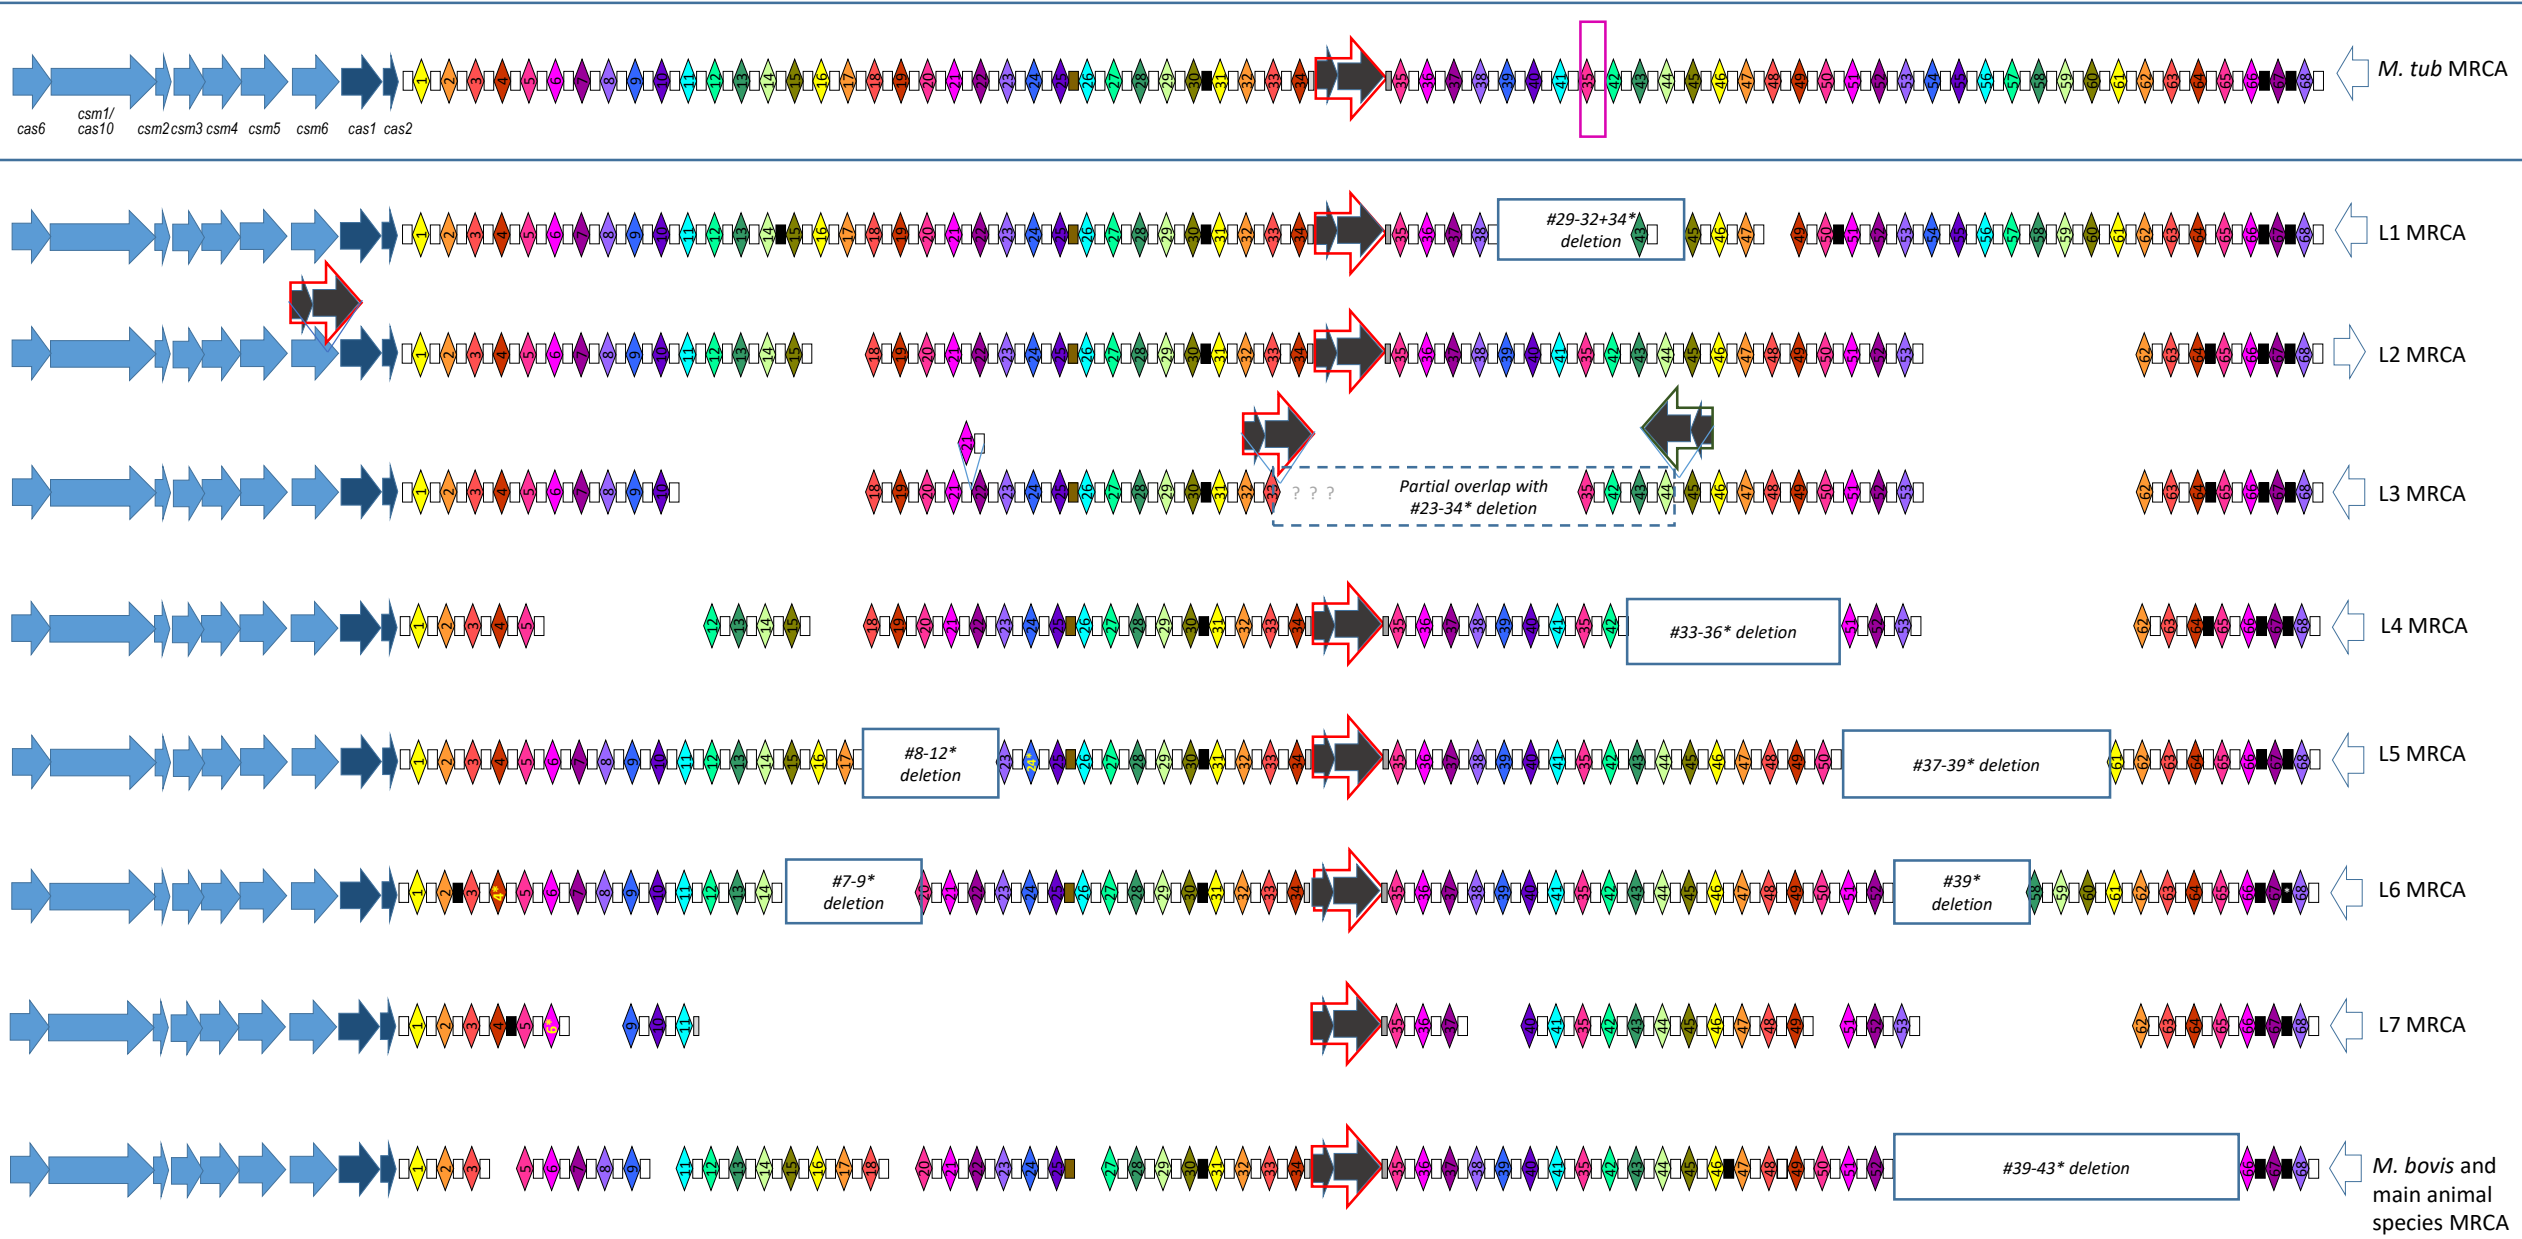

Source: http://biorxiv.org/content/10.1101/2019.12.13.875765v1.full.pdf
